# Supplementary material for: Protein binding-protected DNA three-way junction-mediated rolling circle amplification for sensitive and specific detection of transcription factors
Source: Royal Society of Chemistry journal article supplement (doi:10.1039/c6ra12535b), 2016-01-01
Supplement: c6ra12535b1.pdf [file c6ra12535b1.pdf]

**Protein binding-protected DNA three-way junction-mediated rolling  
circle amplification for sensitive and specific detection of  
transcription factors**

**Kan Li<sup>a</sup>, Lei Wang<sup>b</sup>, Xiaowen Xu<sup>a</sup>, Ting Gao<sup>a</sup>, Wei Jiang<sup>a,\*</sup>**

*<sup>a</sup> Key Laboratory for Colloid and Interface Chemistry of Education Ministry, School  
of Chemistry and Chemical Engineering, Shandong University, 250100 Jinan, P.R.  
China*

*<sup>b</sup> School of Pharmaceutical Sciences, Shandong University, 250012 Jinan, P. R.  
China*

Corresponding author: Tel: 86-531-88363888; fax: 86-531-88564464.

E-mail: [wjiang@sdu.edu.cn](mailto:wjiang@sdu.edu.cn)

**Table S1. Sequences of oligonucleotides used in this study**

| Name             | Sequence (5'→3')                                                                                                                    |
|------------------|-------------------------------------------------------------------------------------------------------------------------------------|
| S1-1             | GTA GCA CTA GGA <u>GGA AAG TCC CGA TCC</u> CCC CG                                                                                   |
| S1-2             | GTA GCA CTA G <u>GGA AAG TCC CGA TCC</u> CCC CG                                                                                     |
| S1-3             | GTA GCA CTA <u>GGA AAG TCC CGA TCC</u> CCC CG                                                                                       |
| S2-1             | CGG GGG <b>GAT</b> <u>CGG GAC TTT CCA</u> TGT CTC TGT CTC T                                                                         |
| S2-2             | CGG GGG <b>GAT</b> <u>CGG GAC TTT CCA</u> TGA GT CTC TGT CTC T                                                                      |
| S2-3             | CGG GGG <b>GAT</b> <u>CGG GAC TTT CCA</u> TGG AGT CTC TGT CTC<br>T                                                                  |
| Entire<br>primer | GTA GCA CTA GGA GTC TCT GTC TCT                                                                                                     |
| Padlock<br>probe | <i>TCC TAG TGC TAC</i> CCC AAC CCG CCC TAC CCA AAA CCC<br>AAC CCG CCC TAC CCA AAA CCC AAC CCG CCC TAC CCA<br><i>AGA GAC AGA GAC</i> |

Note: The binding sequence of NF-kB p50 is underlined. The recognition sequence of AlwI is bold. The complementary sequence of the padlock probe to the DNA three-way junction (TWJ) is italic.

### **Optimization of the reaction conditions**

To obtain the best results, we investigated the reaction conditions. The following are the optimal experimental results of the dosage of AlwI and the concentrations of phi29 DNA polymerase, dNTPs and N-methyl-mesoporphyrin IX (NMM).

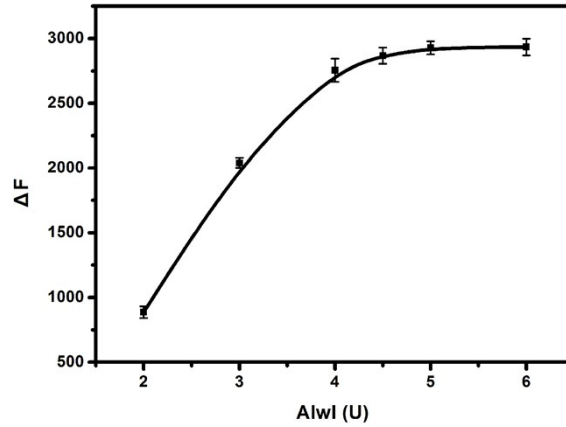

**Fig. S1** Effect of Alwi dosage on the TFs detection system. Dosage: 2.0, 3.0, 4.0, 4.5, 5.0 and 6.0 units. The error bars showed the standard deviation of three replicate determinations.

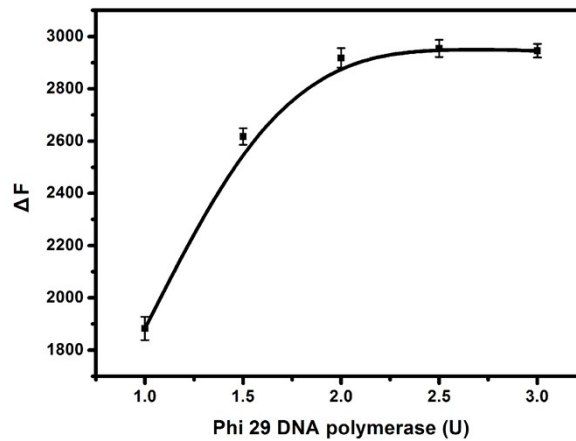

**Fig. S2** Effect of phi29 DNA polymerase dosage on the TFs detection system. The phi29 DNA polymerase dosage: 1.0, 1.5, 2.0, 2.5 and 3.0 U. The error bars showed the standard deviation of three replicate determinations.

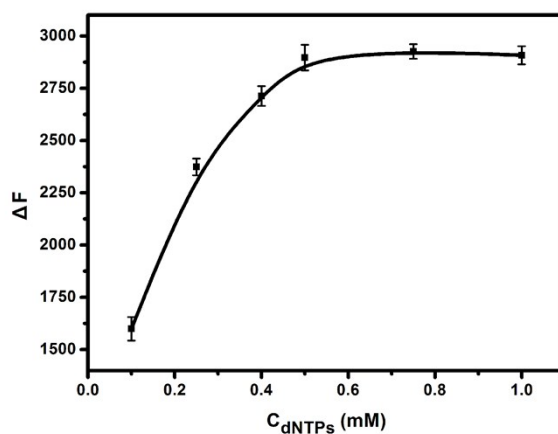

**Fig. S3** Effect of the concentrations of dNTPs on the TFs detection system. The concentrations of dNTPs: 0.1, 0.25, 0.4, 0.5, 0.75 and 1.0 mM. The error bars showed the standard deviation of three replicate determinations.

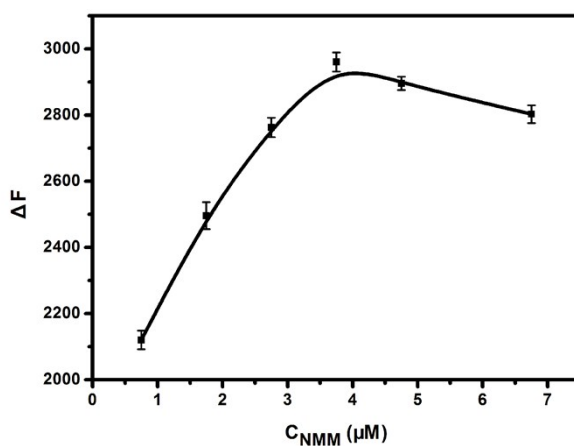

**Fig. S4** Effect of different concentrations of NMM on the TFs detection system. NMM concentration: 0.75, 1.75, 2.75, 3.75, 4.75, and 6.75  $\mu\text{M}$ . The error bars showed the standard deviation of three replicate determinations.

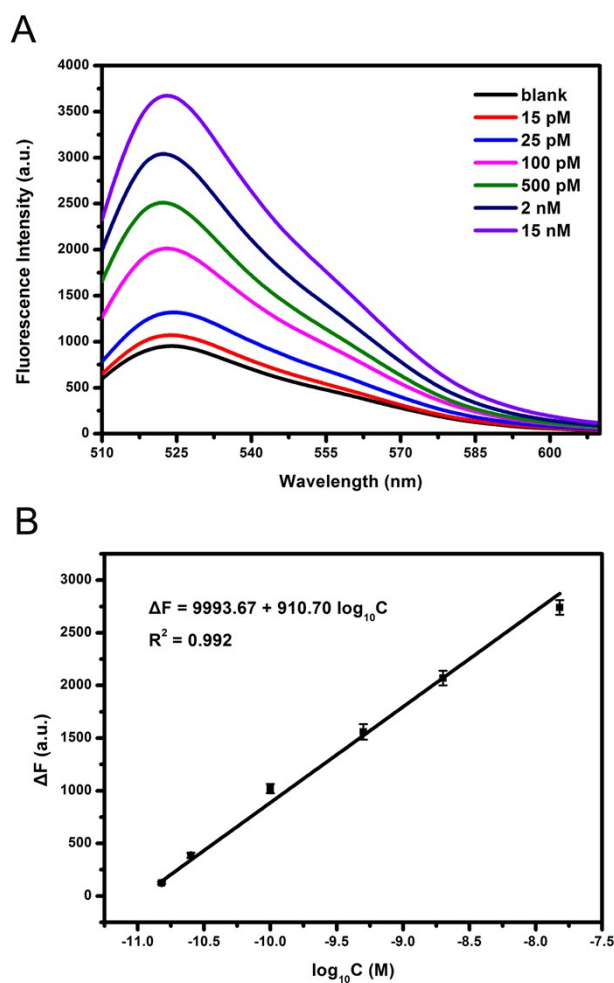

**Fig. S5** (A) Fluorescence curves obtained from different NF- $\kappa$ B p50 concentrations using SYBR Green I as a signal indicator. (B) Linear relationship between the fluorescence enhancement and NF- $\kappa$ B p50 concentration in SYBR Green I method. Error bars indicate the standard deviation of 3 measurements.

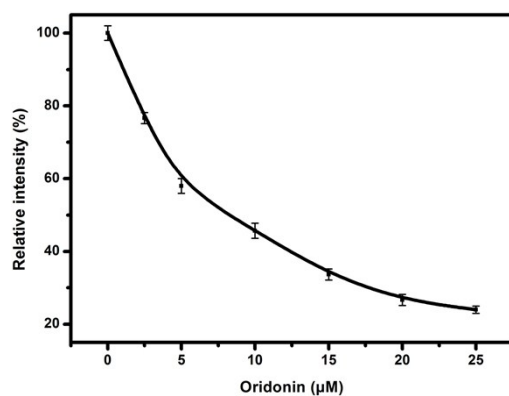

**Fig. S6** The relative fluorescence intensity with addition of oridonin with different

concentrations (0, 2.5, 5.0, 10, 15, 20 and 25  $\mu$  M). Error bars were the standard deviations three independent measurements.

**Table S2. Recovery experiment in this study**

| Concentration<br>(mol/L) | Sample 1<br>(mol/L)   | Sample 2<br>(mol/L)   | Sample 3<br>(mol/L)   | Recovery | RSD  |
|--------------------------|-----------------------|-----------------------|-----------------------|----------|------|
| $5.0 \times 10^{-11}$    | $4.7 \times 10^{-11}$ | $4.8 \times 10^{-11}$ | $4.9 \times 10^{-11}$ | 96.0%    | 2.1% |
| $5.0 \times 10^{-10}$    | $4.9 \times 10^{-10}$ | $5.3 \times 10^{-10}$ | $5.2 \times 10^{-10}$ | 102.7%   | 4.1% |
| $5.0 \times 10^{-9}$     | $4.8 \times 10^{-9}$  | $5.0 \times 10^{-9}$  | $5.0 \times 10^{-9}$  | 98.7%    | 2.3% |
